# Supplementary material
Source: PubMed Central journal article supplement (PMC7269810)

**eFigure 3. Kaplan-Meier Curves for Progression-Free Survival and Overall Survival by high TMB  $\geq 7$  mutations/Mb and *PTEN* alterations in Chemotherapy-Treated mTNBC. (A) Progression-free survival and (C) overall survival by tumor mutational burden  $<7$  vs.  $\geq 7$  mutations/megabase; (B) Progression-free survival and (D) overall survival by *PTEN* alteration (absent vs. present). Abbreviations: mTNBC: metastatic triple-negative breast cancer; TMB: tumor mutational burden; WT: wild type.**

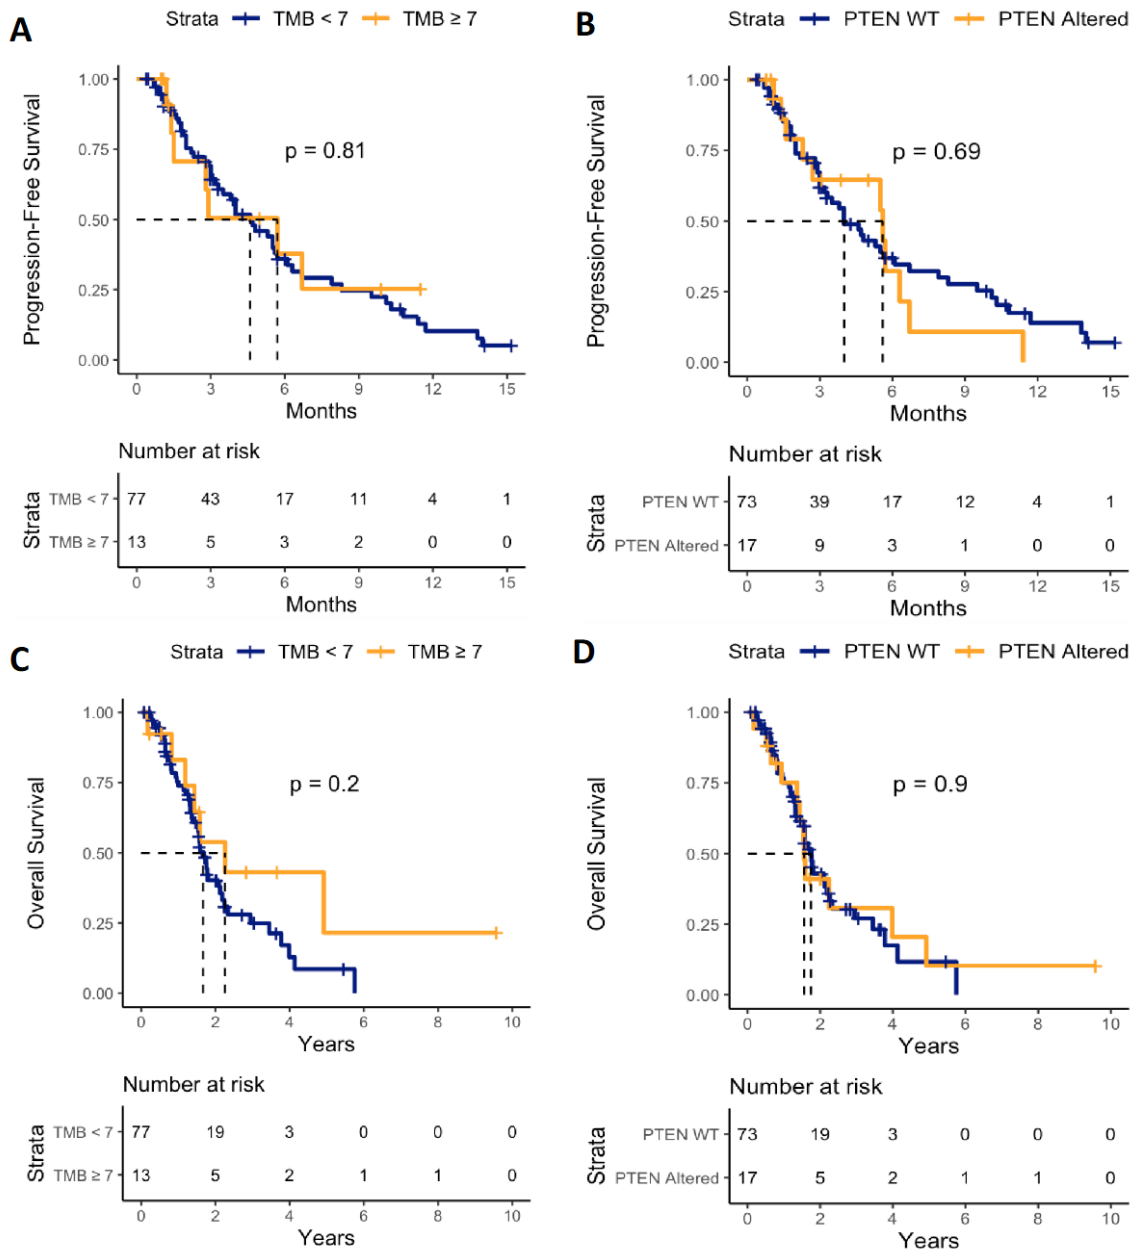

Supplement: NIHMS1557408-supplement-4.pdf [file NIHMS1557408-supplement-4.pdf]
