# Supplementary material
Source: PubMed Central journal article supplement (PMC7269810)

**eFigure 4. Kaplan-Meier curves for progression-free and overall survival for high TMB  $\geq 10$  mutations/Mb in chemotherapy-treated mTNBC. (A) Progression-free survival and (B) overall survival by tumor mutational burden  $<10$  vs.  $\geq 10$  mutations/megabase. Abbreviations: mTNBC: metastatic triple-negative breast cancer; TMB: tumor mutational burden.**

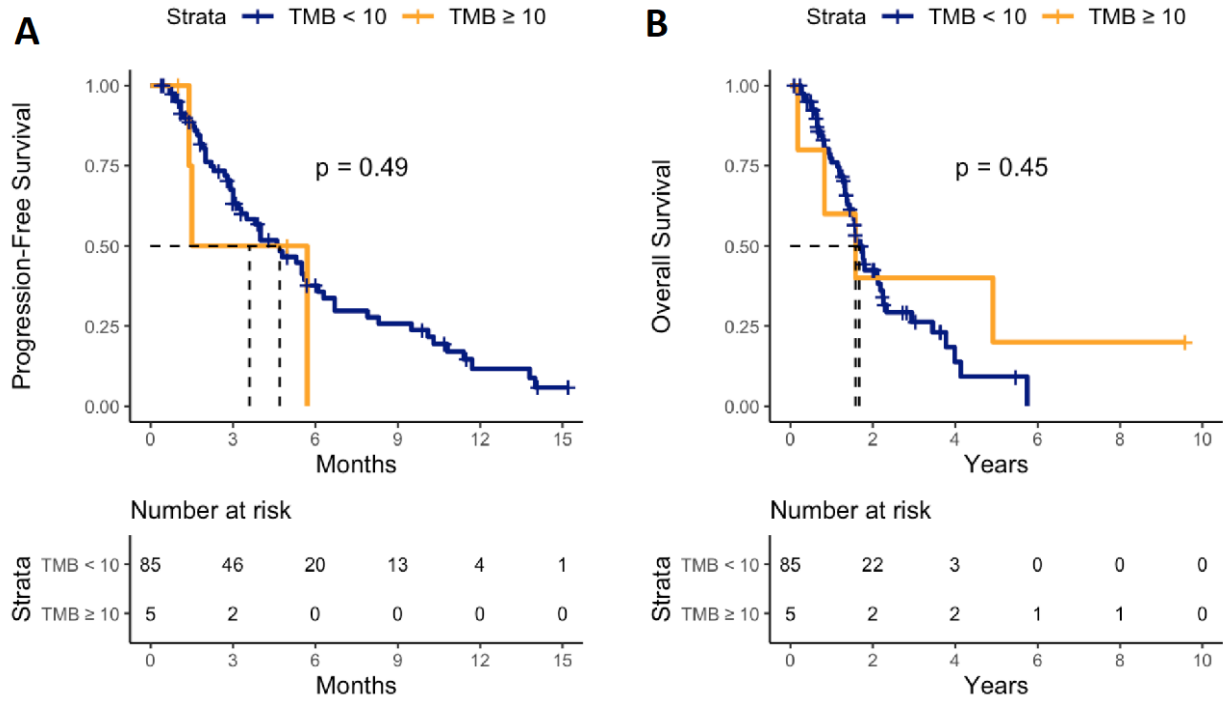

Supplement: NIHMS1557408-supplement-5.pdf [file NIHMS1557408-supplement-5.pdf]
