# Supplementary material
Source: PubMed Central journal article supplement (PMC7269810)
Supplement: NIHMS1557408-supplement-7.pdf [file NIHMS1557408-supplement-7.pdf]

**eTable 1. Baseline characteristics for PD-L1 known cohort**

| <b>Characteristic</b>                         | <b>Total<br/>(n = 62)</b> | <b>PD-L1 Known<br/>(n = 37)</b> |
|-----------------------------------------------|---------------------------|---------------------------------|
| Age, yrs, median (range)                      | 55 (32-76)                | 56 (33-76)                      |
| Female, N (%)                                 | 62 (100)                  | 37 (100)                        |
| ECOG-PS, N (%)                                |                           |                                 |
| 0                                             | 42 (68)                   | 27 (73)                         |
| 1                                             | 20 (32)                   | 10 (27)                         |
| Visceral metastases                           | 46 (74)                   | 29 (78)                         |
| <b>Prior therapies for metastatic disease</b> |                           |                                 |
| Median (range)                                | 1 (0-6)                   | 0 (0-6)                         |
| 0, N (%)                                      | 25 (40)                   | 20 (54)                         |
| 1, N (%)                                      | 19 (31)                   | 8 (22)                          |
| 2, N (%)                                      | 13 (21)                   | 7 (19)                          |
| ≥3, N (%)                                     | 5 (8)                     | 2 (5)                           |
| <b>Previous therapy, N (%)</b>                |                           |                                 |
| Neo(adjuvant) therapy                         | 57 (92)                   | 33 (89)                         |
| Taxanes                                       | 56 (90)                   | 32 (86)                         |
| Anthracycline                                 | 51 (82)                   | 29 (78)                         |
| <b>Regimen, N (%)</b>                         |                           |                                 |
| Monotherapy                                   | 14 (23)                   | 7 (19)                          |
| Combination                                   | 49 (77)                   | 30 (81)                         |

Abbreviations: ECOG-PS: Eastern Cooperative Oncology Group performance status; ORR: objective response rate; yrs: years.
