# Supplementary material
Source: PubMed Central journal article supplement (PMC7269810)
Supplement: NIHMS1557408-supplement-8.pdf [file NIHMS1557408-supplement-8.pdf]

**eTable 2. Univariate and multivariate analysis of *PRKDC* and *TP53* loss with progression-free and overall survival following immune checkpoint-inhibitor-based therapies**

|                                                          | Progression-Free Survival |            |         | Overall Survival |            |         |
|----------------------------------------------------------|---------------------------|------------|---------|------------------|------------|---------|
|                                                          | HR                        | 95% CI     | p-value | HR               | 95% CI     | p-value |
| <b><i>Univariate Models (n = 62)</i></b>                 |                           |            |         |                  |            |         |
| <i>PRKDC</i> mutation                                    | 0.41                      | 0.15-1.15  | 0.09    | 0.31             | 0.09-1.01  | 0.05    |
| <i>TP53</i> loss                                         | 2.23                      | 1.20-4.15  | 0.01    | 2.54             | 1.29-5.01  | 0.01    |
| <b><i>PRKDC Mutation Multivariate Model (n = 62)</i></b> |                           |            |         |                  |            |         |
| <i>PRKDC</i> mutation                                    | 0.03                      | 0.01-0.14  | <0.001  | 0.10             | 0.02-0.47  | 0.003   |
| ECOG PS                                                  | 1.38                      | 0.76-2.50  | 0.29    | 2.33             | 1.20-4.52  | 0.01    |
| Previous lines of therapy                                | 1.40                      | 0.77-2.53  | 0.27    | 1.18             | 0.60-2.30  | 0.63    |
| Regimen                                                  | 15.38                     | 5.02-47.13 | <0.001  | 4.00             | 1.58-10.13 | 0.003   |
| Visceral metastases                                      | 1.04                      | 0.54-2.00  | 0.90    | 0.93             | 0.45-1.91  | 0.84    |
| <b><i>TP53 Loss Multivariate Model (n = 62)</i></b>      |                           |            |         |                  |            |         |
| <i>TP53</i> loss                                         | 2.28                      | 1.18-4.37  | 0.01    | 2.43             | 1.19-4.98  | 0.02    |
| ECOG PS                                                  | 1.87                      | 1.02-3.40  | 0.04    | 3.12             | 1.63-5.95  | 0.0006  |
| Previous lines of therapy                                | 1.48                      | 0.84-2.61  | 0.18    | 1.28             | 0.67-2.44  | 0.45    |
| Regimen                                                  | 1.69                      | 0.84-3.42  | 0.14    | 1.49             | 0.70-3.18  | 0.45    |
| Visceral metastases                                      | 1.33                      | 0.70-2.52  | 0.38    | 1.18             | 0.58-2.37  | 0.65    |

*PRKDC* nonsynonymous mutation: present vs. absent; *TP53* loss: tumors with both a *TP53* nonsynonymous mutation and a *TP53* one copy deletion vs. those without both; ECOG PS:  $\geq 1$  vs. 0; Previous lines of therapy:  $\geq 1$  vs. 0; Regimen: monotherapy vs. combination therapy; Visceral metastases: present vs. absent.

Abbreviations: ECOG PS: Eastern Cooperative Oncology Group performance status; HR; hazard ratio.
